# Supplementary material for: Exploring the potential of MB4 (M = Cr, Mo, and W) MBenes as high-capacity anode materials for Ca-ion batteries: a DFT approach
Source: Royal Society of Chemistry journal article supplement (doi:10.1039/d4ta02176b), 2024-01-01
Supplement: d4ta02176b1.pdf [file d4ta02176b1.pdf]

## Exploring the Potential of MB<sub>4</sub> (M=Cr, Mo, and W) MBenes as a High-capacity Anode Materials for Ca-ion Batteries: A DFT Approach

M. Kashif Masood<sup>1</sup>, Jing Wang<sup>1,\*</sup>, Juntao Song<sup>1</sup>, Ying Liu<sup>1,2</sup>

1. Department of Physics and Hebei Advanced Thin Film Laboratory, Hebei Normal University, Shijiazhuang 050024, China

2. National Key Laboratory for Materials Simulation and Design, Beijing 100083, China

\* Corresponding author E-mail address: [jwang@hebtu.edu.cn](mailto:jwang@hebtu.edu.cn)

### Supplementary File

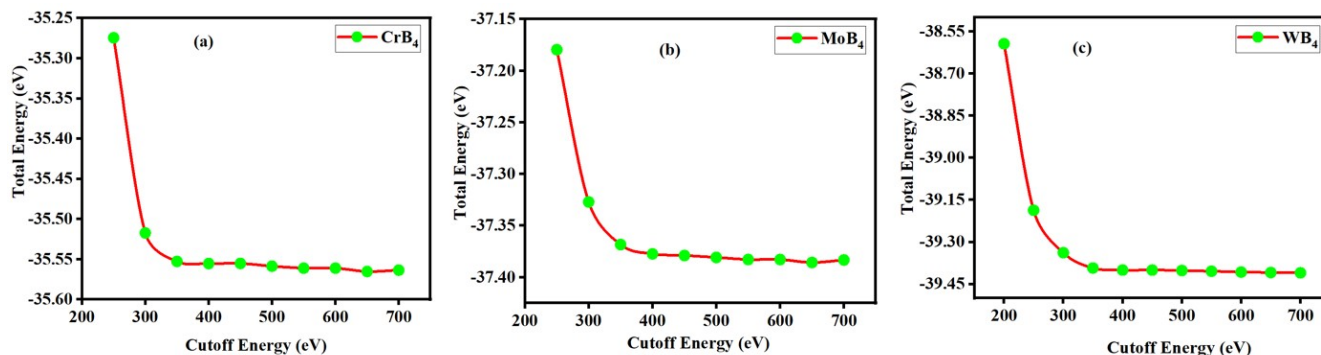

Fig.S1. Convergence test of cutoff energy for (a) CrB<sub>4</sub> (b) MoB<sub>4</sub> (c) WB<sub>4</sub>

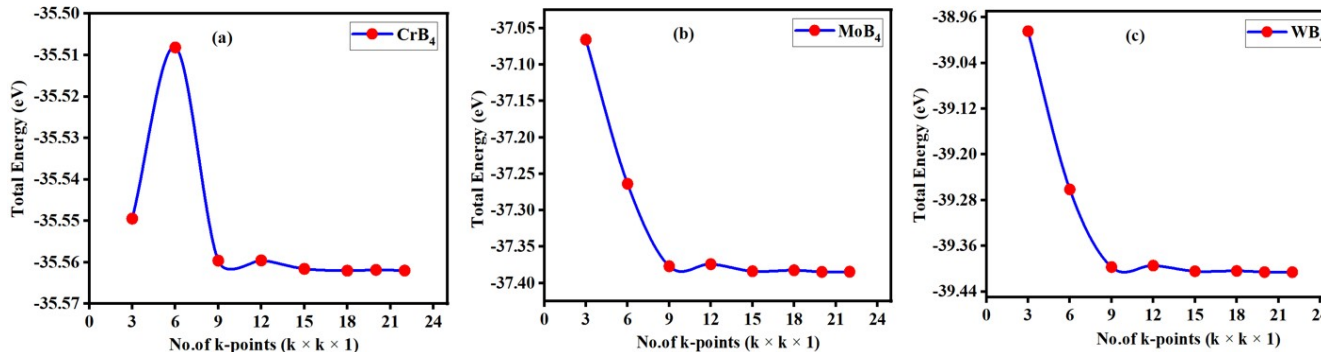

Fig.S2. Convergence test of k-points of unit cell for (a) CrB<sub>4</sub> (b) MoB<sub>4</sub> (c) WB<sub>4</sub>

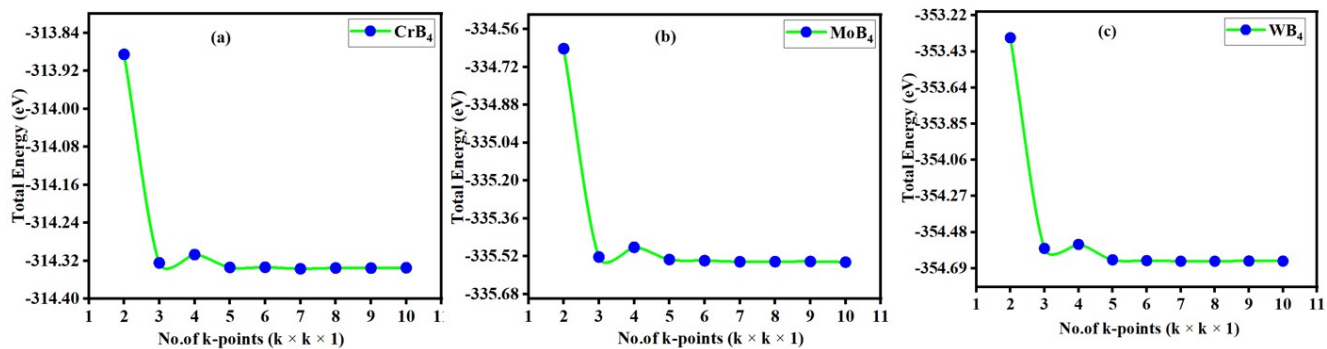

Fig.S3. Convergence test of k-points of 3×3×1 supercell for (a) CrB<sub>4</sub> (b) MoB<sub>4</sub> (c) WB<sub>4</sub>

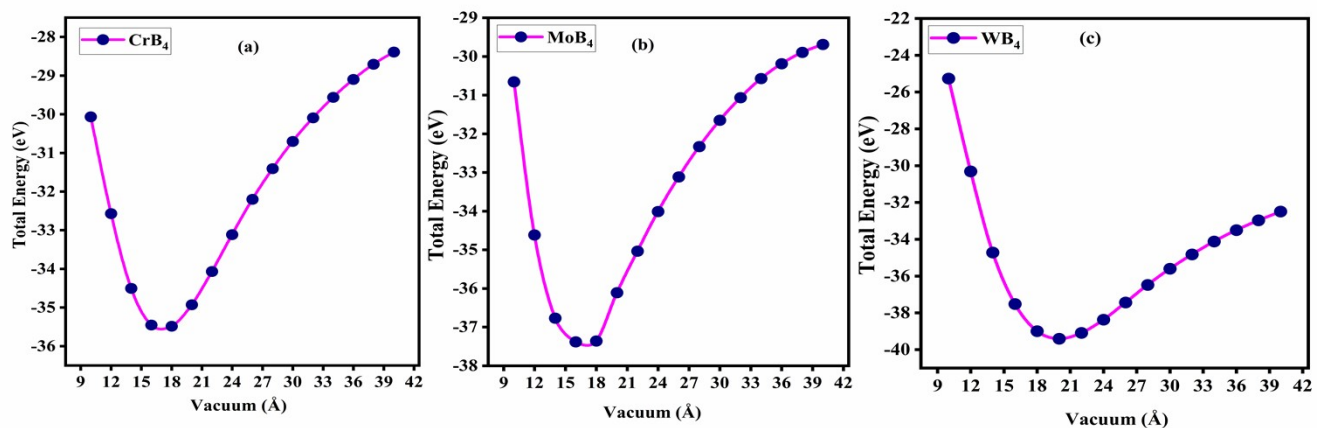

Fig.S4. Convergence test of vacuum space for (a) CrB<sub>4</sub> (b) MoB<sub>4</sub> (c) WB<sub>4</sub>

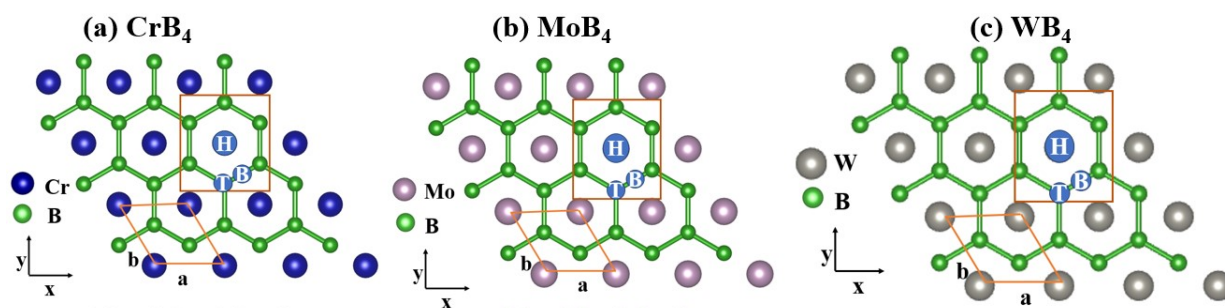

Fig.S5. Top side of Optimized structures (a) CrB<sub>4</sub> (b) MoB<sub>4</sub> (c) WB<sub>4</sub>

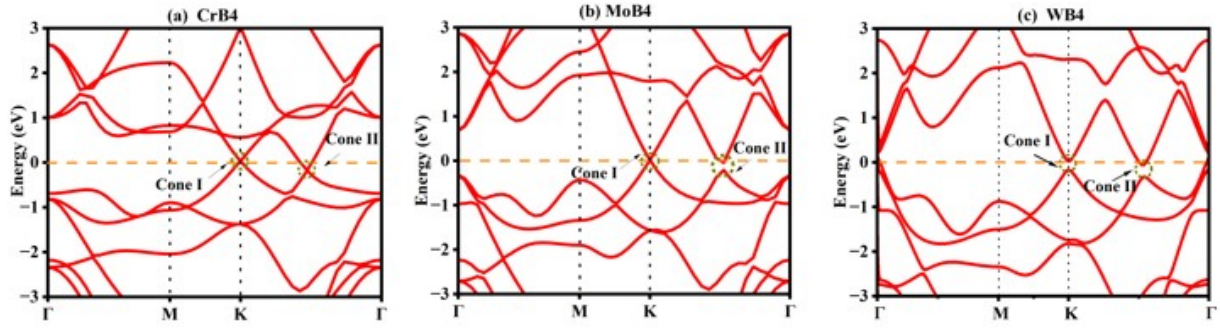

Fig.S6. Calculated 2D band structure for (a) CrB<sub>4</sub> (b) MoB<sub>4</sub> (a) WB<sub>4</sub>

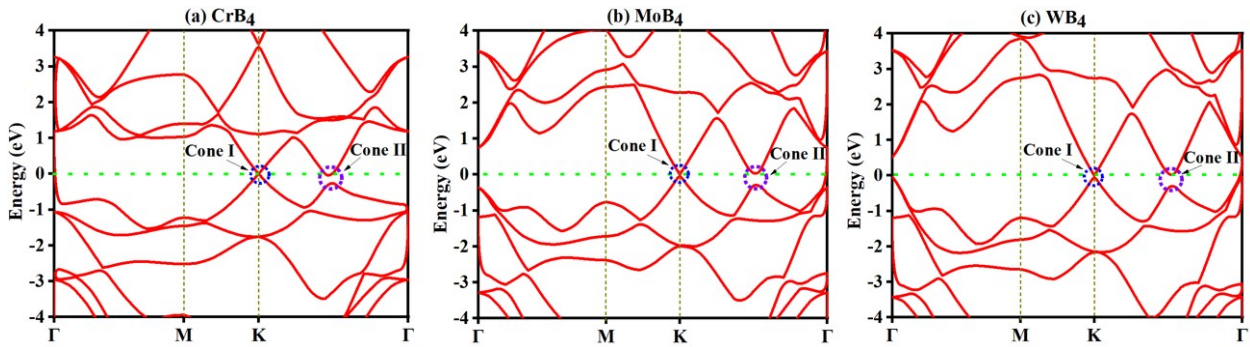

Fig.S7. Calculated 2D band structure for (a) CrB<sub>4</sub> (b) MoB<sub>4</sub> (a) WB<sub>4</sub> with HSE06 method

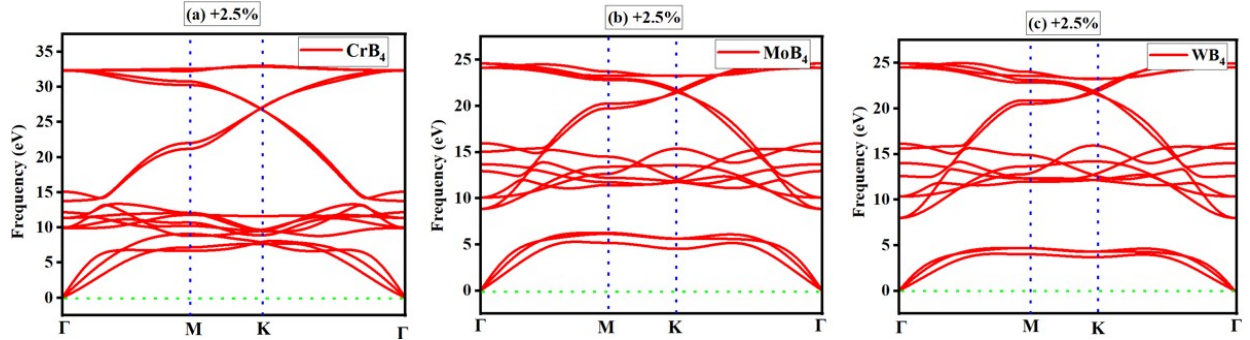

Fig. S8. Phonon dispersion curve under +2.5% strain (a) for CrB<sub>4</sub> and (b) for MoB<sub>4</sub> and (c) for WB<sub>4</sub>.

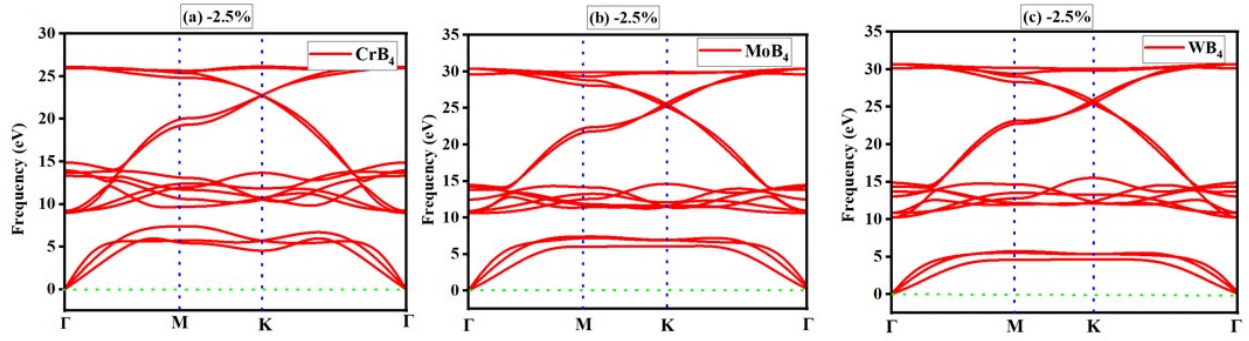

Fig. S9. Phonon dispersion curve under -2.5% strain (a) for CrB<sub>4</sub> and (b) for MoB<sub>4</sub> and (c) for WB<sub>4</sub>.

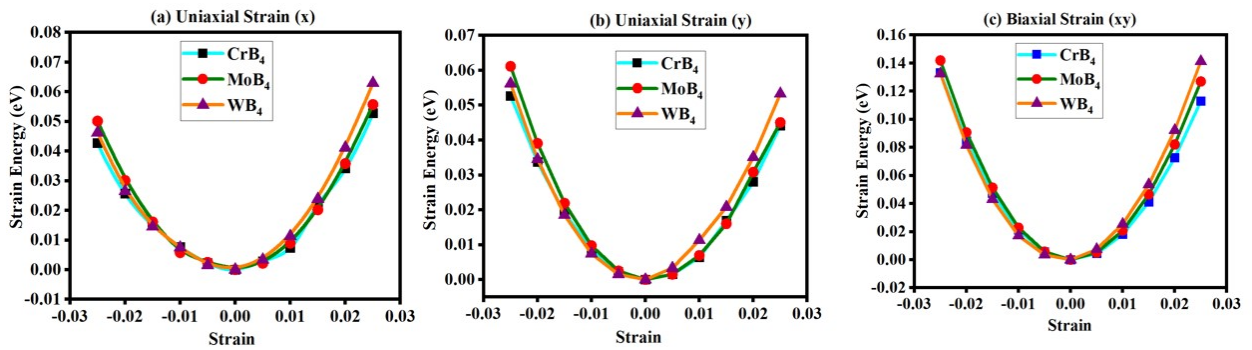

Fig.S10. The curves of strain energy for CrB<sub>4</sub>, MoB<sub>4</sub> and WB<sub>4</sub> (a)with uniaxial along x-axis (b) with uniaxial along y-axis (c) with biaxial along the x- and y-axis.

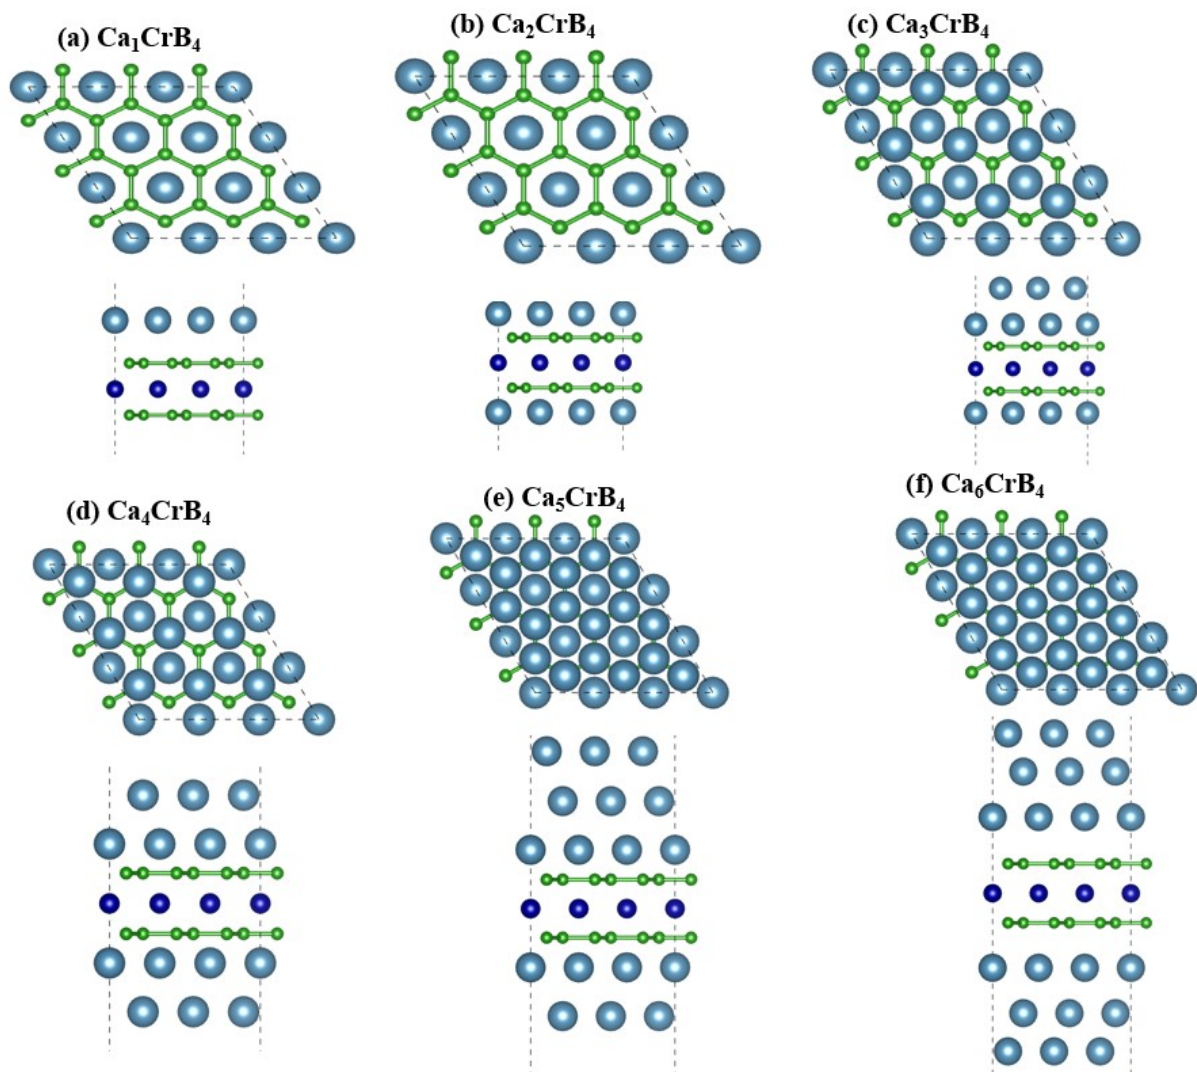

Fig. S11. (a-f) shows the top and side view of adsorption of Ca-atoms layer on  $\text{CrB}_4$  from  $L_1$  to  $L_6$ . Where each layer contains 9 Ca atoms.

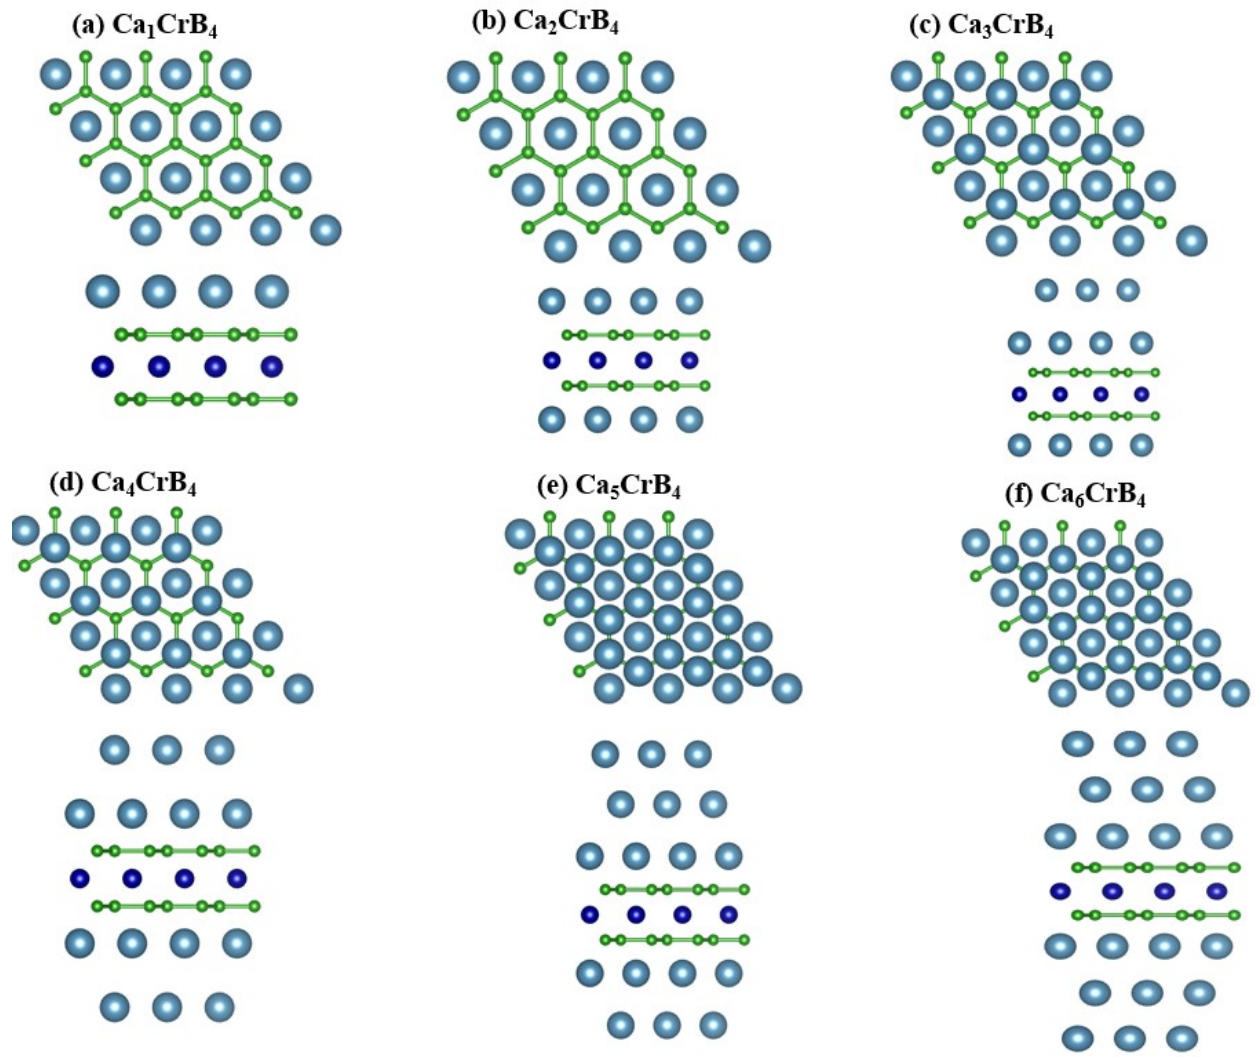

Fig. S12. (a-f) shows the top and side view of optimized structure of  $\text{Ca}_x\text{CrB}_4$  ( $x=1,2,3,4,5,6$ ).

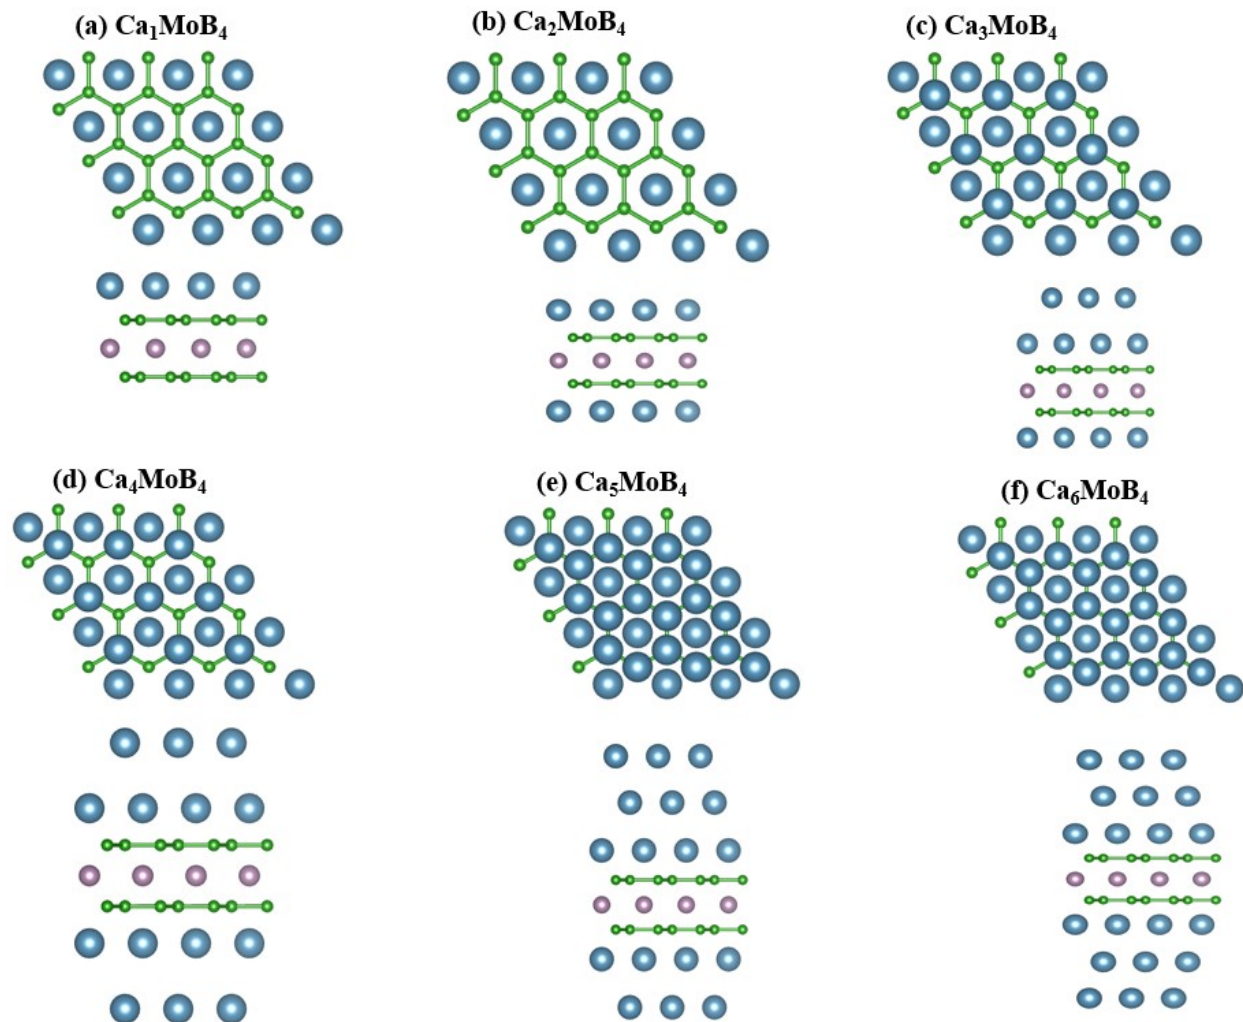

Fig. S13. (a-f) shows the top and side view of optimized structure of  $\text{Ca}_x\text{MoB}_4$  ( $x=1,2,3,4,5,6$ ).

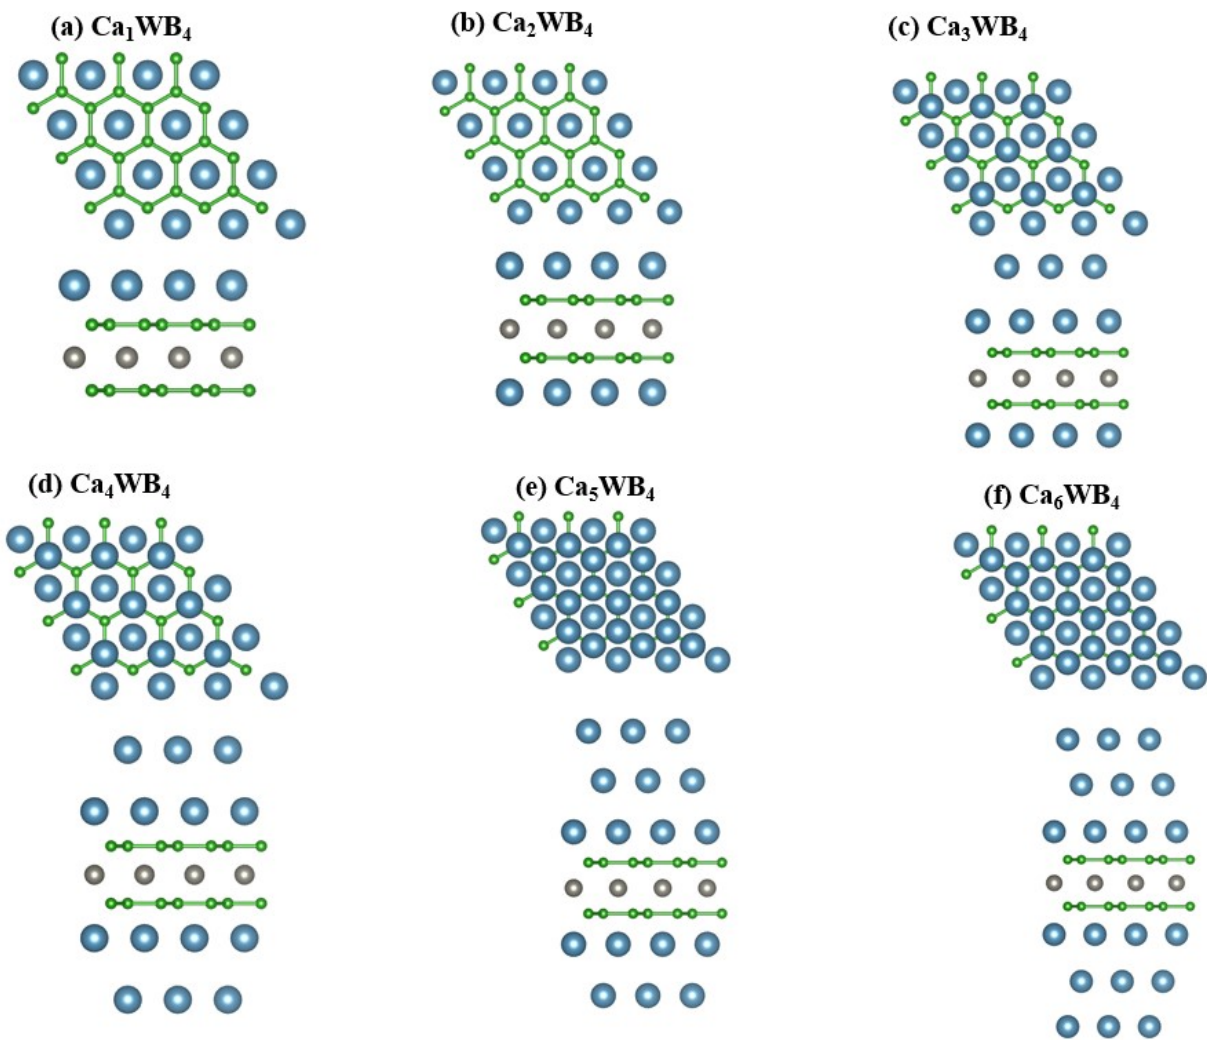

Fig. S14. (a-f) shows the top and side view of optimized structure of  $\text{Ca}_x\text{WB}_4$  ( $x=1,2,3,4,5,6$ ).



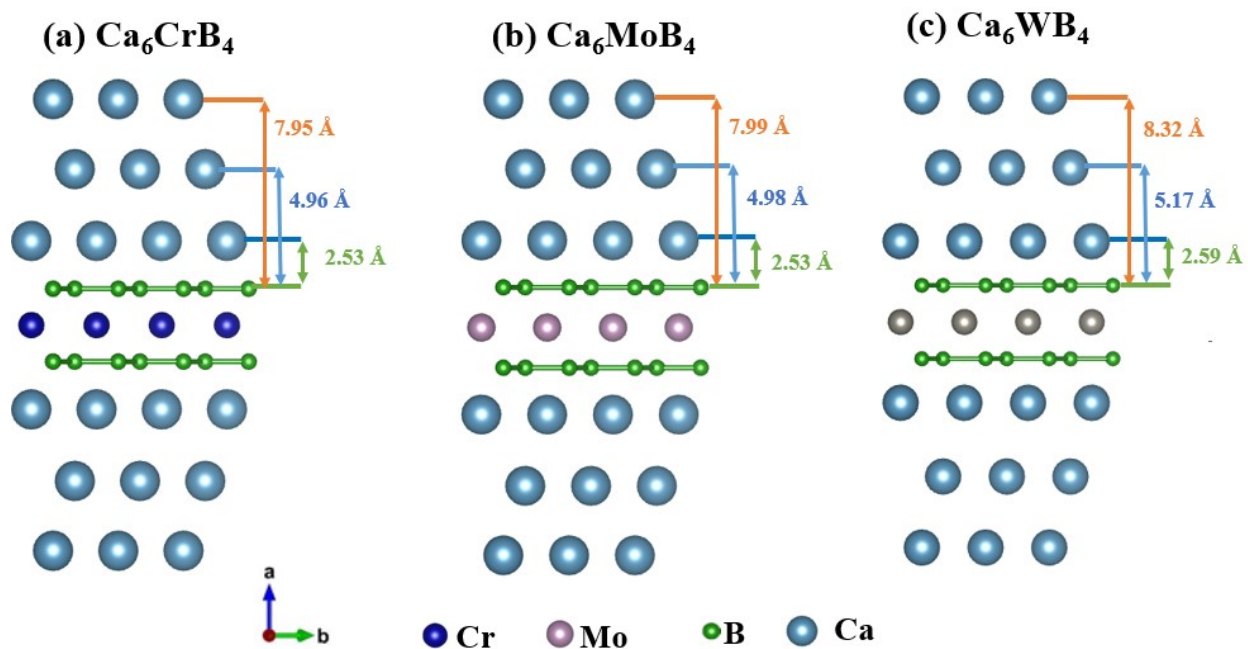

Fig. S15. Comparing the interlayer spacing between the adsorbed Ca-ions layers on the substrate (a)  $\text{Ca}_6\text{CrB}_4$ , (b)  $\text{Ca}_6\text{MoB}_4$ , and (c)  $\text{Ca}_6\text{WB}_4$

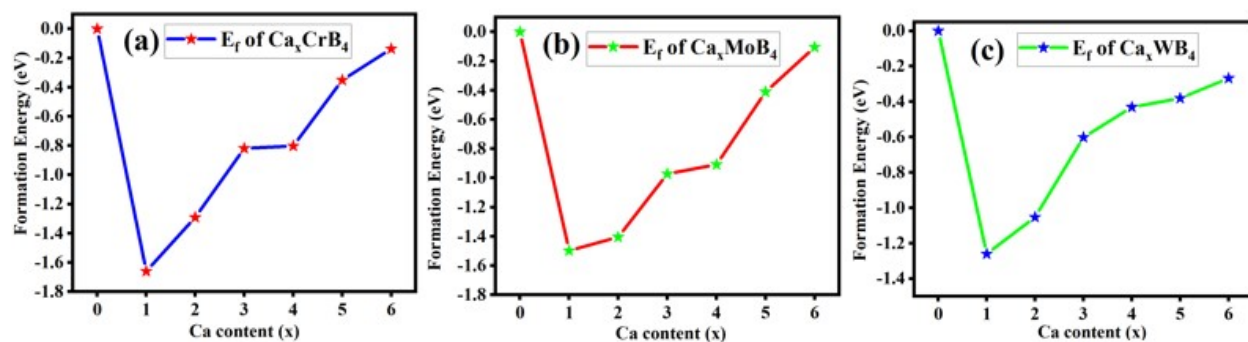

Fig.S16. Formation energy with increasing Ca content (a)  $\text{Ca}_x\text{CrB}_4$ , (b)  $\text{Ca}_x\text{MoB}_4$ , (c)  $\text{Ca}_x\text{WB}_4$  at  $x=1,2,3,4,5,6$ .

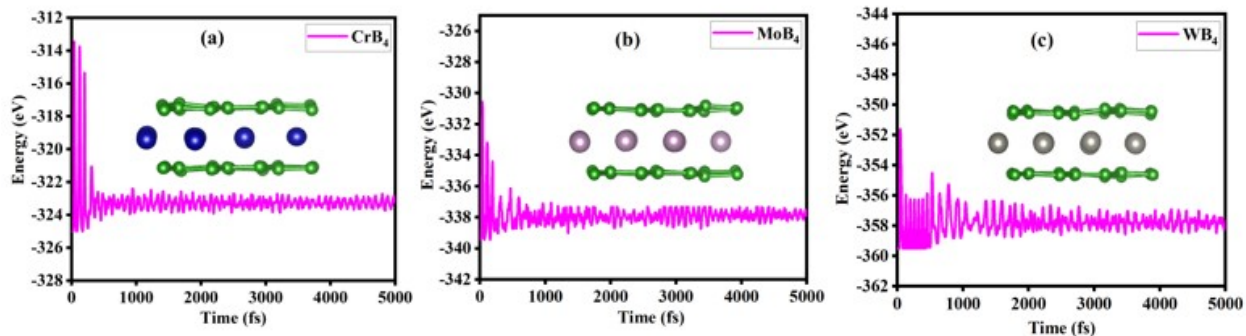

Fig. S17. Energy fluctuation vs time steps for pristine monolayer (a)  $\text{CrB}_4$  (b)  $\text{MoB}_4$  (c)  $\text{WB}_4$

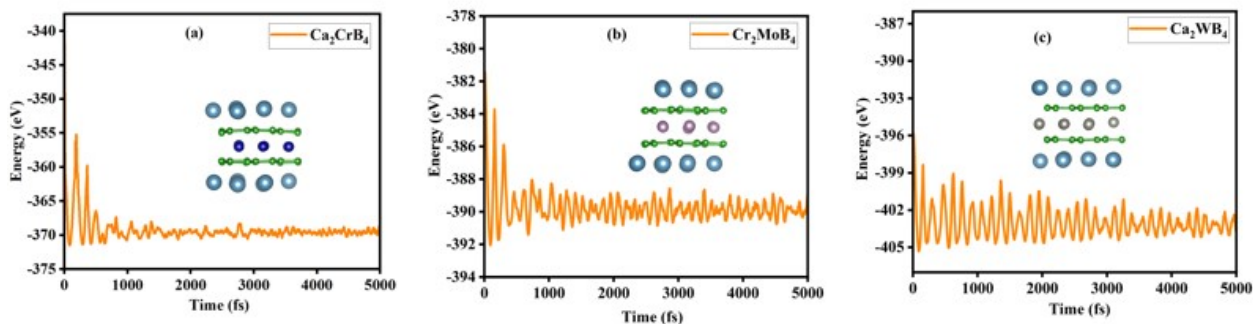

Fig. S18. Energy fluctuation vs time steps for two layer adsorbed-Ca (a)  $\text{Ca}_2\text{CrB}_4$ , (b)  $\text{Ca}_2\text{MoB}_4$ , (c)  $\text{Ca}_2\text{WB}_4$

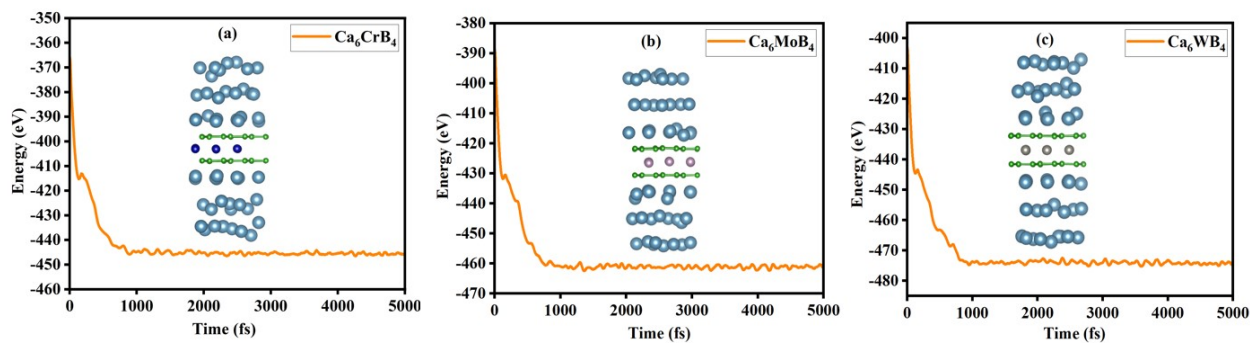

Fig. S19. Energy fluctuations vs. time duration for (a)  $\text{Ca}_6\text{CrB}_4$ , (b)  $\text{Ca}_6\text{MoB}_4$ , (c)  $\text{Ca}_6\text{WB}_4$  at 300K

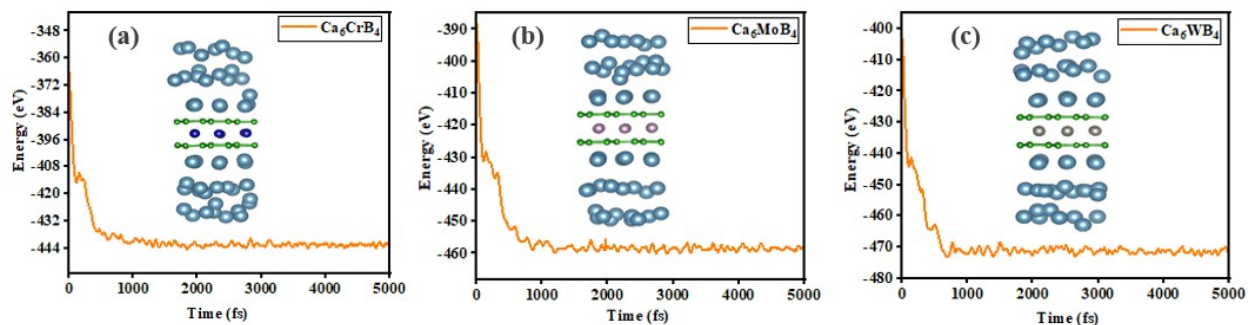

Fig. S20. Energy fluctuations vs. time duration for (a)  $\text{Ca}_6\text{CrB}_4$ , (b)  $\text{Ca}_6\text{MoB}_4$ , (c)  $\text{Ca}_6\text{WB}_4$  at 500K

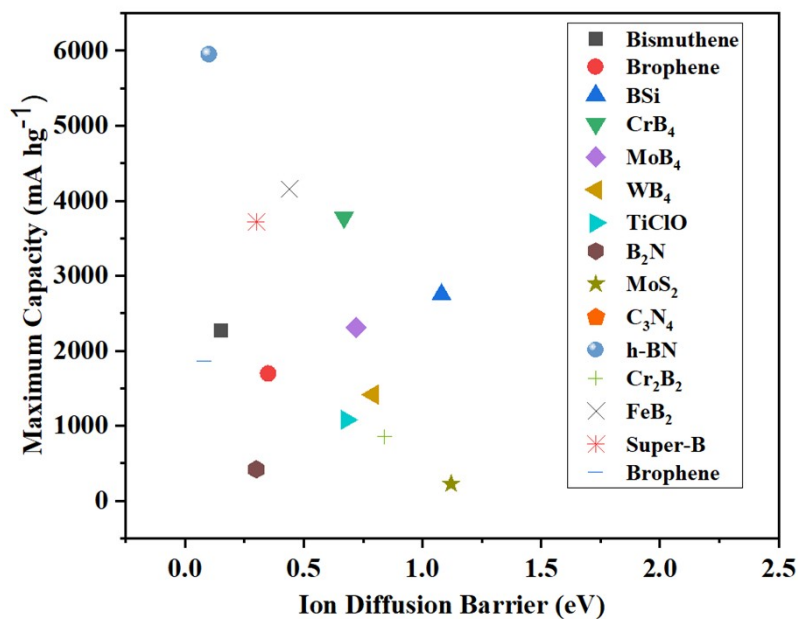

Fig. S21. Comparison of ion diffusion barrier and maximum storage capacity with the other reported anode materials.

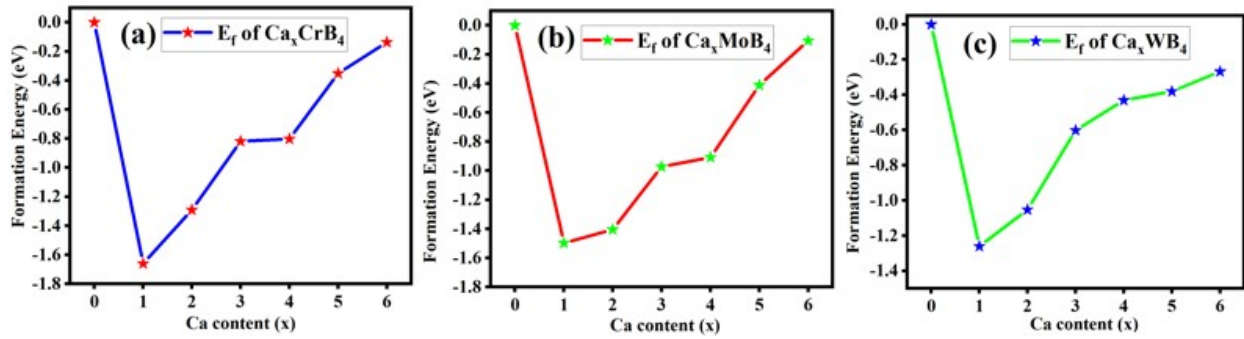

Fig. S22. Variation of lattice parameters with Ca-content (x) (a)  $\text{Ca}_x\text{CrB}_4$ , (b)  $\text{Ca}_x\text{MoB}_4$ , (c)  $\text{Ca}_x\text{WB}_4$

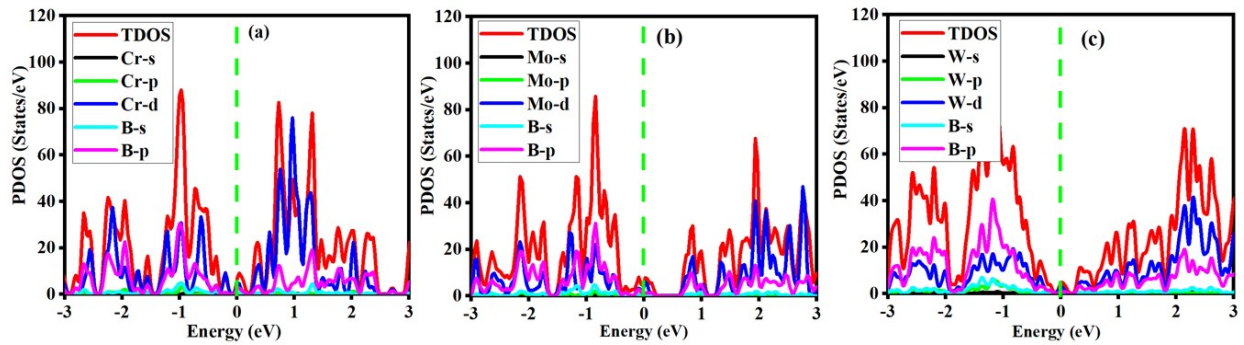

Fig. S23. PDOS with different orbitals for pristine (a)  $\text{CrB}_4$  (b)  $\text{MoB}_4$  (c)  $\text{WB}_4$  monolayer
